# Supplementary material for: Optimising desired gain indices to maximise selection response
Source: Front Plant Sci. 2024 Jun 24;15:1337388. doi: 10.3389/fpls.2024.1337388 (PMC11228337; doi:10.3389/fpls.2024.1337388)
Supplement: Supplementary Table 1 — Summary of the field trials, number of phenotyped individuals, and traits. Trail names were recorded as (Location_year_TimeOfSowing). NoGeno: Number of Genotypes; Prot, protein%; Screen, screening%; TKW, thousand kernel weight (g); YLD, yield (t/ha); Lr, leaf rust; Sr, stem rust; Yr, stripe rust. [file Table_1.xlsx]

## Sheet: Sheet1
Environment	NoGeno	Prot	Screen	TKW	YLD	Lr	Sr	Yr
Cadoux_17_1	201	Yes	Yes	Yes	Yes	.	.	.
Cadoux_17_2	201	Yes	Yes	Yes	Yes	.	.	.
Horsham_17_1	200	.	.	.	Yes	.	.	.
Horsham_17_2	200	.	.	.	Yes	.	.	.
Horsham_17_3	200	.	.	.	Yes	.	.	.
Horsham_18_1	200	.	.	.	Yes	.	.	.
Horsham_18_2	200	.	.	.	Yes	.	.	.
Horsham_19_1	200	Yes	Yes	Yes	Yes	.	.	.
Horsham_19_2	200	Yes	Yes	Yes	Yes	.	.	.
Merredin_18_1	204	Yes	Yes	Yes	Yes	.	.	.
Merredin_18_2	204	.	Yes	Yes	Yes	.	.	.
Merredin_19_1	200	Yes	Yes	Yes	Yes	.	.	.
Merredin_19_2	200	Yes	Yes	Yes	Yes	.	.	.
Merredin_20_1	200	.	Yes	.	Yes	.	.	.
Merredin_20_2	200	.	Yes	.	Yes	.	.	.
Narrabri_14_1	199	.	Yes	Yes	Yes	.	.	.
Narrabri_14_2	199	.	Yes	Yes	Yes	.	.	.
Narrabri_15_1	195	Yes	.	Yes	Yes	.	.	.
Narrabri_15_2	195	Yes	Yes	Yes	Yes	.	.	.
Narrabri_16_1	1956	Yes	Yes	Yes	Yes	Yes	Yes	Yes
Narrabri_16_2	1956	Yes	Yes	Yes	Yes	.	.	.
Narrabri_17_1	1480	Yes	Yes	Yes	Yes	Yes	Yes	Yes
Narrabri_17_2	1480	Yes	Yes	Yes	Yes	.	.	.
Narrabri_18_1	998	Yes	Yes	Yes	Yes	Yes	Yes	Yes
Narrabri_18_2	998	Yes	Yes	Yes	Yes	.	.	.
Narrabri_19_1	747	.	Yes	Yes	Yes	Yes	Yes	Yes
Narrabri_19_2	747	.	Yes	.	Yes	.	.	.
Narrabri_20_1	576	Yes	Yes	Yes	Yes	Yes	Yes	Yes
Narrabri_20_2	576	Yes	Yes	Yes	Yes	.	.	.
Geraldton_19_1	199	.	.	.	Yes	.	.	.
